# Supplementary material
Source: PubMed Central journal article supplement (PMC4022712)
Supplement: NIHMS539435-supplement-AppendixTables.pdf [file NIHMS539435-supplement-AppendixTables.pdf]

Appendix 1. All-cause mortality during 33 years of follow-up according to Body Mass Index and Handgrip Strength in different age groups and different follow-up periods. Mini-Finland Health Examination Survey (n = 3594).

|             |                   | 50-69 years |              |         |              | ≥ 70 years |              |         |              |
|-------------|-------------------|-------------|--------------|---------|--------------|------------|--------------|---------|--------------|
|             |                   | Model 1     |              | Model 2 |              | Model 1    |              | Model 2 |              |
|             |                   | HR          | (95% CI)     | HR      | (95% CI)     | HR         | (95% CI)     | HR      | (95% CI)     |
| 0-15 years  | Body Mass Index   |             |              |         |              |            |              |         |              |
|             | 18.5-24.9         | 1.00        |              | 1.00    |              | 1.00       |              | 1.00    |              |
|             | 25-29.9           | 1.00        | (0.90, 1.11) | 0.97    | (0.88, 1.08) | 0.87       | (0.74, 1.03) | 0.81    | (0.68, 0.96) |
|             | ≥ 30              | 1.03        | (0.93, 1.15) | 1.07    | (0.94, 1.21) | 0.85       | (0.69, 1.05) | 0.79    | (0.64, 0.98) |
| 15-33 years | Body Mass Index   |             |              |         |              |            |              |         |              |
|             | 18.5-24.9         | 1.00        |              | 1.00    |              | 1.00       |              | 1.00    |              |
|             | 25-29.9           | 1.04        | (0.92, 1.17) | 1.01    | (0.90, 1.14) | 0.84       | (0.62, 1.16) | 0.79    | (0.57, 1.10) |
|             | ≥ 30              | 1.14        | (1.01, 1.29) | 1.14    | (0.98, 1.32) | 0.81       | (0.55, 1.20) | 0.76    | (0.51, 1.13) |
| 0-15 years  | Handgrip strength |             |              |         |              |            |              |         |              |
|             | High              | 1.00        |              | 1.00    |              | 1.00       |              | 1.00    |              |
|             | Medium            | 1.01        | (0.90, 1.13) | 0.99    | (0.89, 1.11) | 1.04       | (0.86, 1.25) | 0.99    | (0.82, 1.19) |
|             | Low               | 1.11        | (0.99, 1.25) | 1.09    | (0.97, 1.22) | 1.19       | (0.98, 1.44) | 1.19    | (0.98, 1.44) |
| 15-33 years | Handgrip strength |             |              |         |              |            |              |         |              |
|             | High              | 1.00        |              | 1.00    |              | 1.00       |              | 1.00    |              |
|             | Medium            | 1.07        | (0.94, 1.21) | 1.04    | (0.92, 1.19) | 1.07       | (0.75, 1.51) | 1.03    | (0.73, 1.47) |
|             | Low               | 1.10        | (0.96, 1.26) | 1.09    | (0.96, 1.25) | 1.29       | (0.91, 1.81) | 1.23    | (0.87, 1.74) |

Notes: Model 1 adjusted for age, sex, education, smoking, alcohol use, physical activity and handgrip strength / body mass index.

Model 2 additionally adjusted for baseline hypertension, cardiovascular disease, diabetes and cancer.

Appendix 2. All-cause mortality during 33 years of follow-up according to Body Mass Index and Handgrip Strength in different age groups and smoking status. Mini-Finland Health Examination Survey (n = 3594).

|                   |           | 50-69 years |              |         |              | ≥ 70 years |              |         |              |
|-------------------|-----------|-------------|--------------|---------|--------------|------------|--------------|---------|--------------|
|                   |           | Model 1     |              | Model 2 |              | Model 1    |              | Model 2 |              |
|                   |           | HR          | (95% CI)     | HR      | (95% CI)     | HR         | (95% CI)     | HR      | (95% CI)     |
| Body Mass Index   |           |             |              |         |              |            |              |         |              |
| Never smoker      | 18.5-24.9 | 1.00        |              | 1.00    |              | 1.00       |              | 1.00    |              |
|                   | 25-29.9   | 1.07        | (0.93, 1.24) | 1.05    | (0.89, 1.24) | 1.00       | (0.82, 1.23) | 0.91    | (0.74, 1.12) |
|                   | ≥ 30      | 1.14        | (0.96, 1.34) | 1.03    | (0.89, 1.19) | 1.03       | (0.80, 1.31) | 0.96    | (0.75, 1.24) |
| Body Mass Index   |           |             |              |         |              |            |              |         |              |
| Ever smoker       | 18.5-24.9 | 1.00        |              | 1.00    |              | 1.00       |              | 1.00    |              |
|                   | 25-29.9   | 0.92        | (0.80, 1.07) | 0.90    | (0.77, 1.04) | 0.58       | (0.40, 0.84) | 0.52    | (0.35, 0.76) |
|                   | ≥ 30      | 1.39        | (1.14, 1.69) | 1.24    | (1.01, 1.51) | 0.51       | (0.31, 0.84) | 0.40    | (0.24, 0.68) |
| Handgrip strength |           |             |              |         |              |            |              |         |              |
| Never smoker      | High      | 1.00        |              | 1.00    |              | 1.00       |              | 1.00    |              |
|                   | Medium    | 1.08        | (0.93, 1.27) | 1.04    | (0.89, 1.21) | 1.28       | (1.02, 1.60) | 1.20    | (0.96, 1.50) |
|                   | Low       | 1.17        | (1.00, 1.37) | 1.12    | (0.96, 1.32) | 1.37       | (1.10, 1.71) | 1.35    | (1.08, 1.69) |
| Handgrip strength |           |             |              |         |              |            |              |         |              |
| Ever smoker       | High      | 1.00        |              | 1.00    |              | 1.00       |              | 1.00    |              |
|                   | Medium    | 1.05        | (0.89, 1.23) | 1.03    | (0.88, 1.22) | 0.90       | (0.61, 1.33) | 0.79    | (0.53, 1.17) |
|                   | Low       | 1.12        | (0.95, 1.32) | 1.10    | (0.93, 1.30) | 0.91       | (0.59, 1.39) | 0.91    | (0.59, 1.41) |

Notes: Model 1 adjusted for age, sex, education, smoking, alcohol use, physical activity and handgrip strength / body mass index.

Model 2 additionally adjusted for baseline hypertension, cardiovascular disease, diabetes and cancer.
